# Supplementary material for: Microencapsulated Pomegranate Reverts High-Density Lipoprotein (HDL)-Induced Endothelial Dysfunction and Reduces Postprandial Triglyceridemia in Women with Acute Coronary Syndrome
Source: PubMed Central journal article supplement (PMC6722536; doi:10.3390/nu11081710), 2019-07-25
Supplement: nutrients-11-01710-s001.pdf [file nutrients-11-01710-s001.pdf]

**Supplementary Table S1.** Anthropometric characteristics of the non-ACS women and nutrients intake before and after 30 days of supplementation with MiPo

| <b>Parameters</b>               | <b>Pre-supplementation<br/>Fasting condition<br/>n=6</b> | <b>Post-supplementation<br/>Fasting condition<br/>n=6</b> | <b>P<br/>value *</b> |
|---------------------------------|----------------------------------------------------------|-----------------------------------------------------------|----------------------|
| <b>Age (years)</b>              |                                                          | 57 (41-65)                                                |                      |
| <b>BMI (kg/m<sup>2</sup>)</b>   | 27.8 (25.4-30.1)                                         | 27.8 (25.1-29.8)                                          | 0.138                |
| <b>Waist circumference (cm)</b> | 93.7 (84.4-98.3)                                         | 92.9 (82.5-97.6)                                          | 0.027                |
| <b>Systolic BP (mmHg)</b>       | 109 (100-117)                                            | 109 (99-113)                                              | 0.686                |
| <b>Diastolic BP (mmHg)</b>      | 72 (63-75)                                               | 75 (70-82)                                                | 0.173                |
| <b>Nutrients intake</b>         |                                                          |                                                           |                      |
| <b>Carbohydrates (%)</b>        | 44.5 (41.2-47.9)                                         | 45.2 (43.0-46.9)                                          | 0.580                |
| <b>Lipids (%)</b>               | 21.3 (18.9-22.4)                                         | 22.0 (19.7-23.6)                                          | 0.705                |
| <b>Protein (%)</b>              | 30.2 (29.5-32.8)                                         | 29.4 (26.9-31.8)                                          | 0.105                |
| <b>Calories (kcal)</b>          | 1765.7 (1641.9-1901.5)                                   | 1801.8 (1674.4-1899.7)                                    | 0.456                |

Data are expressed as median (interquartile range). \* Wilcoxon's test. BMI: Body mass index. BP: Blood pressure

**Supplementary Table S2.** Effects of MiPo supplementation on plasma lipids and glucose concentrations in non-ACS women

| Parameter                        |      | Sample time (n=6)                |                                  |                                    |
|----------------------------------|------|----------------------------------|----------------------------------|------------------------------------|
|                                  |      | 0h                               | 4h                               | 8h                                 |
| <b>Glucose (mg/dL)</b>           | Pre  | 92.2 (86.6-100.8)                | 80.1 (71.1-93.8)                 | 89.4 (83.7-91.3)                   |
|                                  | Post | 83.8 (79.5-91.6)                 | 93.6 (83.3-102.8)                | 89.8 (86.9-91.6)                   |
| <b>Total cholesterol (mg/dL)</b> | Pre  | 208.0 (149.1-281.8)              | 190.5 (156.9-296.7)              | 232.1 (165.8-276.9)                |
|                                  | Post | 135.2 (114.6-172.0) <sup>a</sup> | 153.8 (129.3-213.8) <sup>d</sup> | 159.1 (110.3 -204.3)               |
| <b>LDL-C (mg/dL)</b>             | Pre  | 130.4 (87.9-226.1)               | 112.2 (76.6-230.2)               | 135.2 (86.9-191.4)                 |
|                                  | Post | 80.7 (63.4-107.9) <sup>a</sup>   | 82.1 (65.0-144.2)                | 91.5 (58.3-143.5)                  |
| <b>Triglycerides (mg/dL)</b>     | Pre  | 136.9 (89.0-235.5)               | 226.9 (130.4-306.1) <sup>a</sup> | 267.4 (135.9-380.5) <sup>a</sup>   |
|                                  | Post | 95.6 (77.7-115.6) <sup>a</sup>   | 171.8 (146.9-189.3) <sup>d</sup> | 145.7 (118.6-179.4) <sup>d,e</sup> |
| <b>iAUC (h.mg/dL)</b>            | Pre  |                                  | 471.4 (259.7-686.4)              |                                    |
|                                  | Post |                                  | 404.7 (193.2-499.1)              |                                    |
| <b>HDL-C (mg/dL)</b>             | Pre  | 37.6 (34.4-40.5)                 | 31.4 (29.0-33.4) <sup>a</sup>    | 34.0 (28.2-37.5)                   |
|                                  | Post | 35.6 (32.1-41.3)                 | 34.8 (31.9-38.3)                 | 31.3 (27.6-37.8) <sup>d</sup>      |
| <b>HDL-Tg (mg/dL)</b>            | Pre  | 27.3 (18.2-32.0)                 | 30.9 (26.6-35.1) <sup>a</sup>    | 33.0 (30.9-36.1) <sup>a</sup>      |
|                                  | Post | 25.6 (23.1-28.6)                 | 27.6 (22.1-34.0)                 | 29.5 (20.9-37.0)                   |
| <b>HDL-Pho (mg/dL)</b>           | Pre  | 80.2 (66.3-102.4)                | 85.9 (79.4-97.5)                 | 99.6 (89.8-111.5) <sup>a,b</sup>   |
|                                  | Post | 82.4 (65.8-99.4)                 | 84.8 (71.7-93.2)                 | 84.1 (75.1-96.9) <sup>c</sup>      |
| <b>Ratios</b>                    |      |                                  |                                  |                                    |
| <b>HDL-C/HDL-Pho</b>             | Pre  | 0.469 (0.370-0.551)              | 0.349 (0.295-0.412) <sup>a</sup> | 0.334 (0.297-0.357) <sup>a</sup>   |
|                                  | Post | 0.442 (0.391-0.482)              | 0.429 (0.402-0.475) <sup>b</sup> | 0.385 (0.275-0.399) <sup>e</sup>   |
| <b>HDL-Tg/HDL-Pho</b>            | Pre  | 0.358 (0.271-0.390)              | 0.356 (0.286-0.430)              | 0.333 (0.276-0.391)                |
|                                  | Post | 0.296 (0.274-0.343)              | 0.364 (0.237-0.452)              | 0.369 (0.275-0.399)                |

The duration of the supplementation was 30 days. Data are expressed in median (interquartile range). Wilcoxon's test <sup>a</sup> p≤0.05 vs. 0h pre-supplementation. <sup>b</sup> p≤0.05 vs. 4h pre-supplementation. <sup>c</sup> p≤0.05 vs. 8h pre-supplementation. <sup>d</sup> p≤0.05 vs. 0h post-supplementation. <sup>e</sup> p≤0.05 vs. 4h post-supplementation.
